# Supplementary material for: The anti-corrosive behavior of benzo-fused N-heterocycles: anin silicostudy toward developing organic corrosion inhibitors
Source: Royal Society of Chemistry journal article supplement (doi:10.1039/d1cp04820a), 2021-12-16
Supplement: d1cp04820a1.pdf [file d1cp04820a1.pdf]

## Supporting Information

### The Anti-corrosive Behavior of Benzo-Fused N-Heterocycles: An In-Silico Study Toward Developing Organic Corrosion Inhibitors

Morad M. El-Hendawy, \* Asmaa M. Kamel, Mahmoud M. A. Mohamed

Department of Chemistry, Faculty of Science, New Valley University, Kharga 72511, Egypt

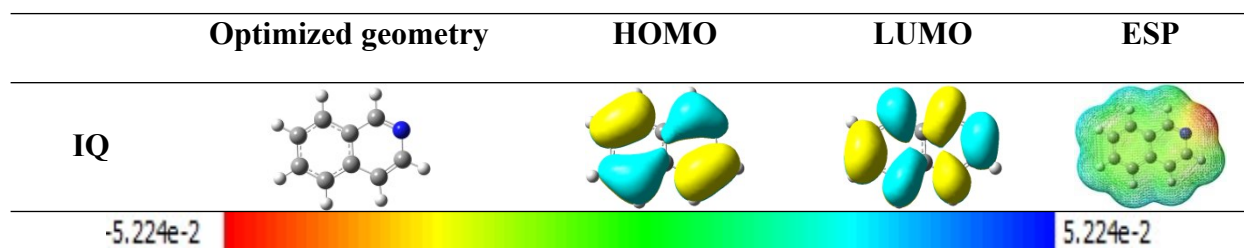

**Fig. S1.** Optimized geometry, FMOs density distributions, and electrostatic potential (ESP) structures of IQ molecule using DFT/6-311++G (d, p) level of theory.

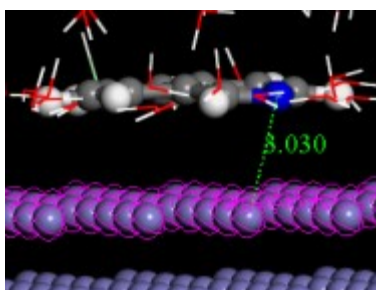

IQ

**Fig. S2.** The most stable configurations for adsorption of the IQ molecule on Fe(110) surface using MC simulations.

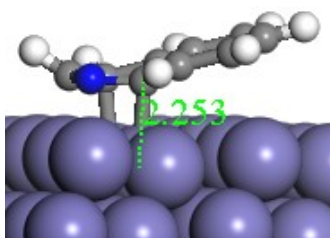

IQ

**Fig. S3.** The most stable adsorption configurations for the IQ/Fe(110) systems. The length of chemical bonds is shown in the graph.

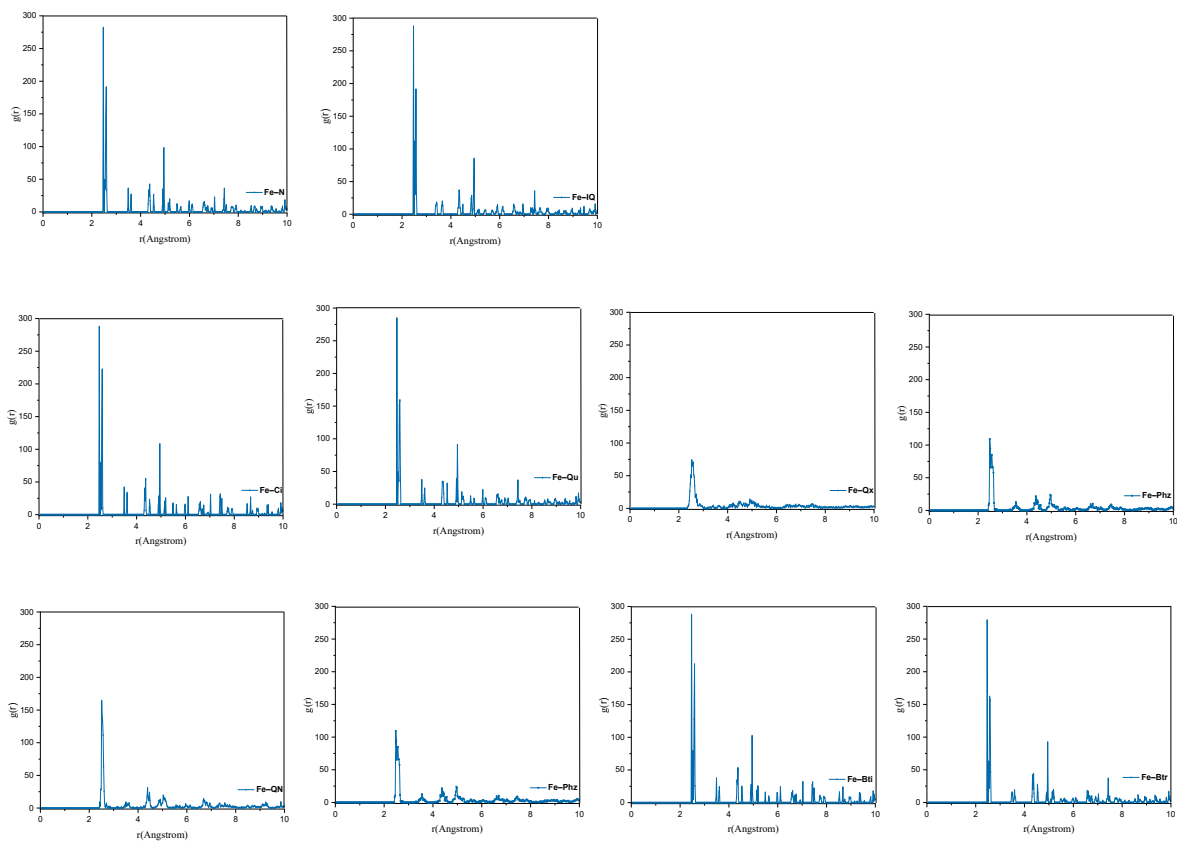

**Fig. S4.** RDF curves of studied inhibitors interacting with Fe (1 1 0) plane obtained after MD simulation.

**Effect of gradual insertion of N atoms**

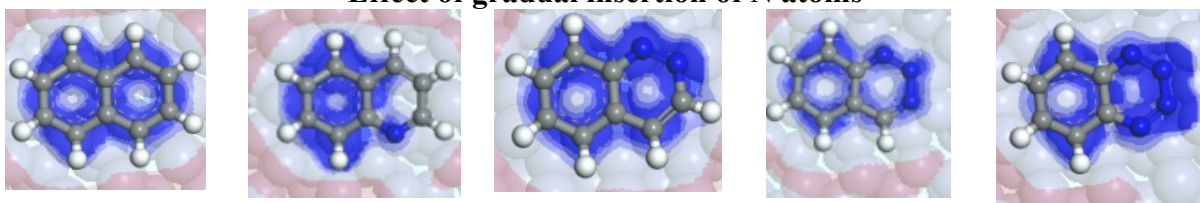

**N**

**QN**

**Ci**

**Bti**

**Btr**

**Effect of positional isomerism of N atoms**

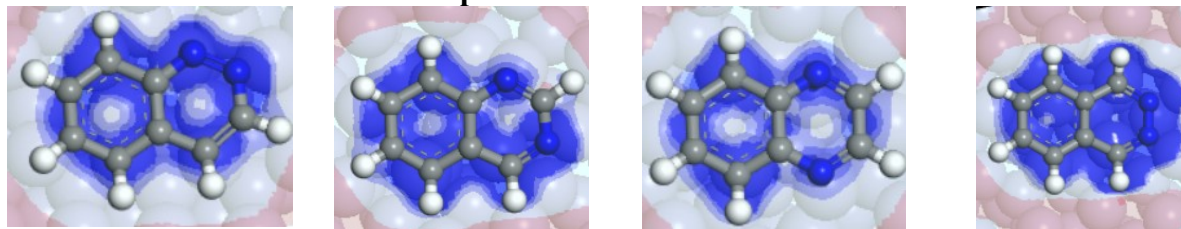

**Ci**

**Qu**

**Qx**

**Phz**

**Fig. S5.** Charge density difference for the studied adsorption systems. The red region indicates the loss of electrons, while electron accumulation is indicated in blue. (Cutoff value of  $\pm 0.002 e \text{ \AA}^{-3}$ ).

**Table S1:** Theoretical ionization potential energies of inhibitors and their available experimental ionization potential energies

| Molecule   |          |      |
|------------|----------|------|
| <b>N</b>   | 8.16 [1] | 8.17 |
| <b>QN</b>  | 8.67 [2] | 8.69 |
| <b>IQ</b>  | 8.55 [3] | 8.60 |
| <b>Ci</b>  | 8.95 [3] | 9.11 |
| <b>QX</b>  | 9.01 [4] | 9.10 |
| <b>Phz</b> | 9.22 [3] | 9.32 |

**Table S2:** Natural atomic charges of studied inhibitors using DFT/6-311++G (d, p) level of theory

| Atom                                             | X <sub>1</sub> | X <sub>2</sub> | X <sub>3</sub> | X <sub>4</sub> | C <sub>4a</sub> | C <sub>5</sub> | C <sub>6</sub> | C <sub>7</sub> | C <sub>8</sub> | C <sub>8a</sub> |
|--------------------------------------------------|----------------|----------------|----------------|----------------|-----------------|----------------|----------------|----------------|----------------|-----------------|
| <b>Effect of gradual insertion of N atoms</b>    |                |                |                |                |                 |                |                |                |                |                 |
| <b>N</b>                                         | -0.18          | -0.20          | -0.21          | -0.16          | -0.07           | -0.18          | -0.20          | -0.20          | -0.18          | -0.05           |
| <b>IQ</b>                                        | 0.10           | -0.45          | 0.03           | -0.22          | -0.04           | -0.18          | -0.18          | -0.20          | -0.16          | -0.10           |
| <b>QN</b>                                        | -0.44          | 0.07           | -0.25          | -0.14          | -0.09           | -0.18          | -0.20          | -0.19          | -0.18          | 0.17            |
| <b>Bti</b>                                       | -0.21          | -0.01          | -0.27          | 0.09           | -0.11           | -0.17          | -0.18          | -0.18          | -0.17          | 0.14            |
| <b>Btr</b>                                       | -0.18          | -0.04          | -0.04          | -0.18          | 0.11            | -0.18          | -0.17          | -0.17          | -0.18          | 0.11            |
| <b>Effect of positional isomerism of N atoms</b> |                |                |                |                |                 |                |                |                |                |                 |
| <b>Ci</b>                                        | -0.20          | -0.22          | -0.01          | -0.18          | -0.07           | -0.19          | -0.18          | -0.20          | -0.17          | 0.13            |
| <b>Qu</b>                                        | -0.46          | 0.28           | -0.48          | 0.13           | -0.14           | -0.17          | -0.20          | -0.18          | -0.19          | 0.18            |
| <b>Qx</b>                                        | -0.40          | 0.03           | 0.03           | -0.40          | 0.13            | -0.18          | -0.19          | -0.19          | -0.18          | 0.13            |
| <b>Phz</b>                                       | 0.07           | -0.25          | -0.25          | 0.07           | -0.08           | -0.17          | -0.15          | -0.15          | -0.17          | -0.08           |

**Table S3:** The computed adsorption parameters by Monte Carlo simulation (in kcal/mol)

|           | Total energy | Adsorption energy | Rigid adsorption energy | Deformation energy | $dE_{ad}/dN_i$ |                  |       |
|-----------|--------------|-------------------|-------------------------|--------------------|----------------|------------------|-------|
|           |              |                   |                         |                    | Inh.           | H <sub>2</sub> O | HCl   |
| <b>IQ</b> | -2611.84     | -2715.12          | -2858.17                | 143.05             | -95.95         | -14.68           | -5.81 |

**Table S4:** Bond length (BL, Å) between the **IQ** atoms and the iron surface atoms as well as their type of interactions (T, Top; H, Hallow; B, Bridge)

| <b>IQ</b> |      |
|-----------|------|
| BL        | Type |
|           |      |

---

|                       |      |   |
|-----------------------|------|---|
| <b>X<sub>1</sub></b>  | 2.25 | T |
| <b>X<sub>2</sub></b>  | 2.59 | H |
| <b>X<sub>3</sub></b>  | 2.27 | H |
| <b>X<sub>4</sub></b>  | 2.26 | B |
| <b>C<sub>4a</sub></b> | 2.90 | H |
| <b>C<sub>5</sub></b>  | 2.73 | T |
| <b>C<sub>6</sub></b>  | 3.20 | H |
| <b>C<sub>7</sub></b>  | 2.93 | H |
| <b>C<sub>8</sub></b>  | 2.72 | T |
| <b>C<sub>8a</sub></b> | 2.89 | H |

---

## References

1. R. A.W. Johnstone, F. A. Mellon, S. D.Ward, Online acquisition of ionization efficiency data, Intern. J. Mass Spectrom. Ion Phys., 5 (1970) 241.
2. J. H. D. Eland, C. J. Danby, Inner ionization potentials of aromatic compounds, Z. Naturforsch. 23a (1968) 355-357.
3. A. J. Yench, M. A. El-Sayed, Lowest ionization potentials of some nitrogen heterocyclics, J. Chem. Phys. 48 (1968) 3469.
4. F. Brogli, E. Heilbronner, T. Kobayashi, Photoelectron spectra of azabenzenes and azanaphthalenes: II. A reinvestigation of azanaphthalenes by high-resolution photoelectron spectroscopy, Helv. Chim. Acta 55 (1972) 274.
